# Supplementary material for: Meteoritic Matter and Spherules in a Presumed Impact Crater at Emmerting, Germany
Source: Preprints.org preprint supplement (doi:10.20944/preprints202403.1621.v1), 2024-03-26

*Supplementary material to Procházka et al.: Meteoritic Matter and Spherules in a Presumed Impact Crater at Emmerting, Germany (chapter 3.1.2)*

**Figure S1.** TGA results: Ignition loss for 11 temperatures in the bulk <2mm fraction and in NFa from Crater No. 4.


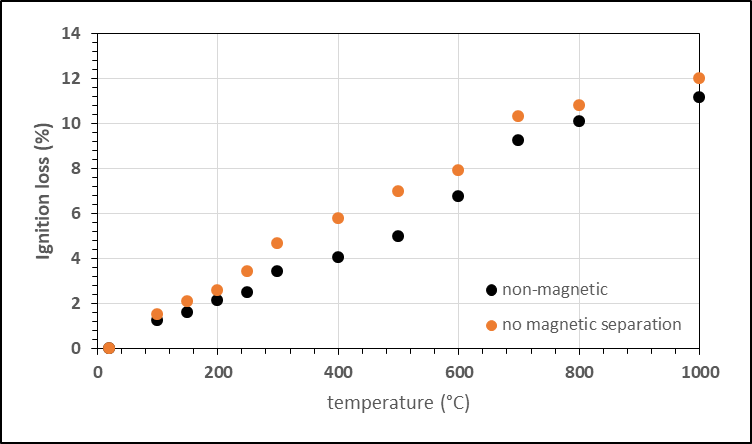

Supplement: Supplementary file 1 [file supplementary]
